# Supplementary material for: Metal-mediated formation of liquid crystals: synthesis, structural and thermal analysis of palladium(ii) complexes of crown thioether derivativesElectronic supplementary information (ESI) available: Figs. 1–3 with full captions, Fig. 4: view of the packing of [Pd(7)][BF4]2. Fig. 5: schematic of undulating layers in [Pd(7)][BF4]2. See http://www.rsc.org/suppdata/cc/b1/b107027b/
Source: Royal Society of Chemistry journal article supplement (doi:10.1039/b107027b), 2001-11-23
Supplement: figsb107027b.doc [file figsb107027b.doc]

**Fig. 1** View of the structure of [Pd(**1**)]2+ with numbering scheme adopted.


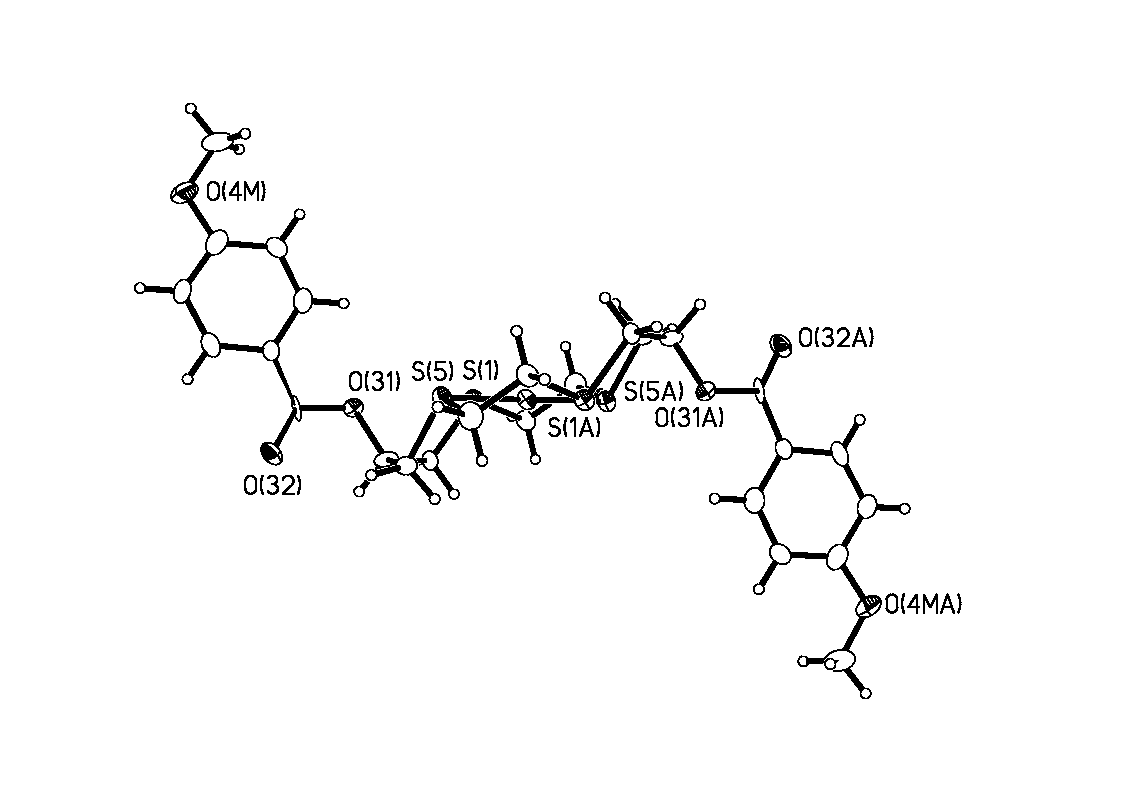
Pd-S(1), 2.288(2); Pd-S(5), 2.275(3)Å; <S(1)-Pd-S(5), 89.92(9). Ellipsoids are drawn at 50% probability. Atoms whose labels carry the suffix A are related to the corresponding atoms with no such suffix by the operation of a crystallographic inversion centre.

**Fig. 2** View of the structure of [Pd(**4**)]2+ with numbering scheme adopted.


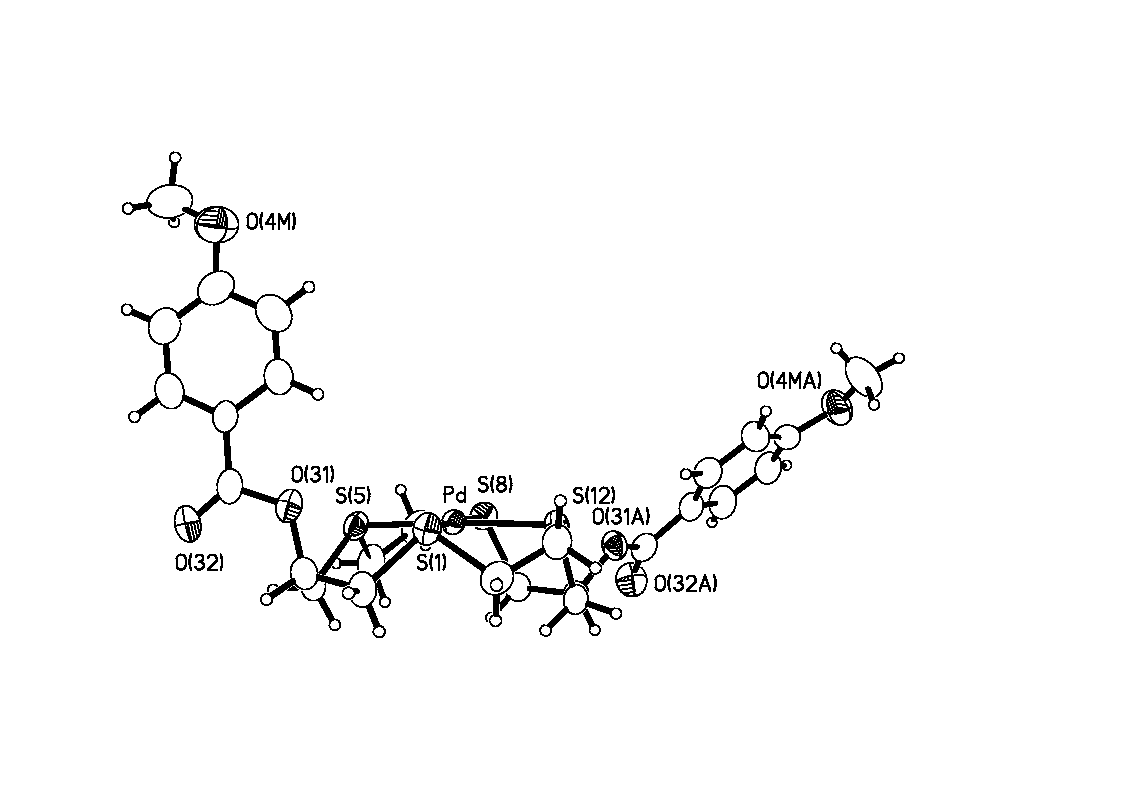
Pd-S(1), 2.281(2); Pd-S(5), 2.280(2); Pd-S(8), 2.299(2); Pd-S(12), 2.301(2)Å; S(1)-Pd-S(5), 94.98(8); S(1)-Pd-S(8), 176.27(8); S(5)-Pd-S(8), 88.75(8); S(5)-Pd-S(12), 174.94(8)o. Ellipsoids are drawn at 50% probability.

**Fig. 3** View of the structure of [Pd(**7**)]2+ with numbering scheme adopted.


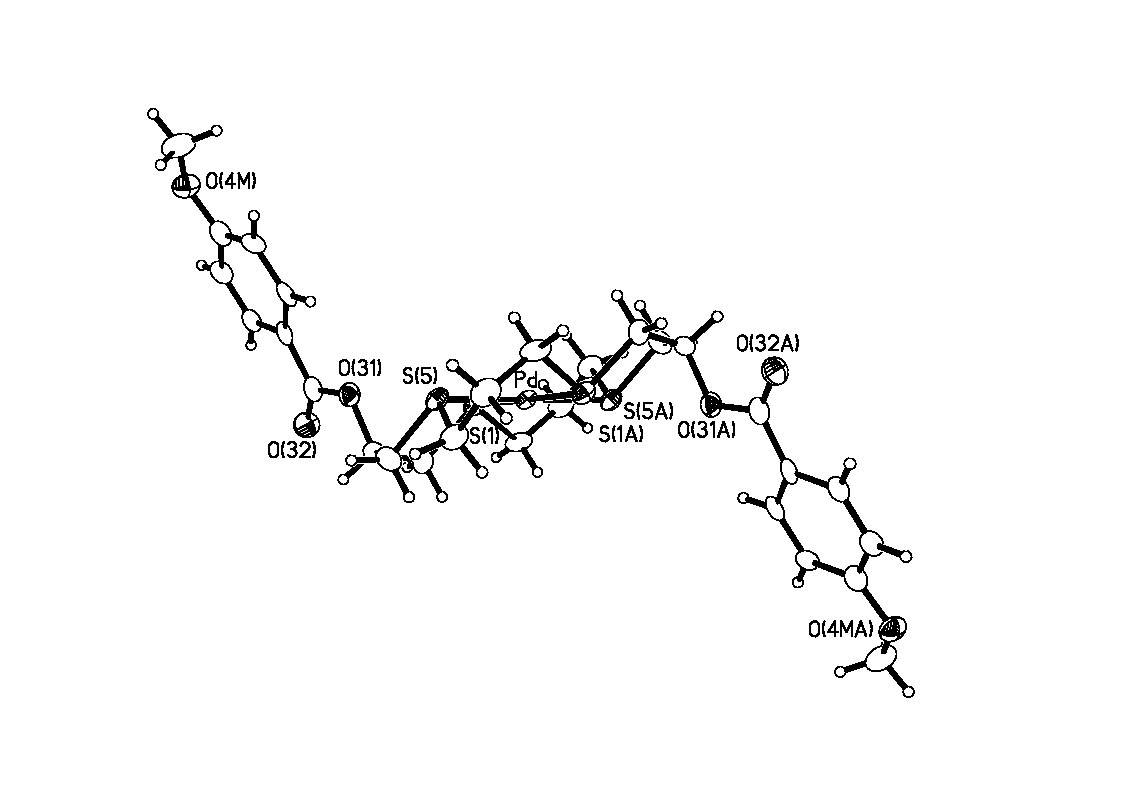
Pd-S(1), 2.317(2); Pd-S(5), 2.338(2)Å; S(1)-Pd-S(5), 90.15(7)o. Ellipsoids are drawn at 50% probability. Atoms whose labels carry the suffix A are related to the corresponding atoms with no such suffix by the operation of a crystallographic inversion centre.
